# Supplementary material for: Comparative Analysis of Re-Annotated Genes Provides Insight into Evolutionary Divergence and Expressions of Aquaporin Family in Pepper
Source: Plants (Basel). 2021 May 21;10(6):1039. doi: 10.3390/plants10061039 (PMC8224332; doi:10.3390/plants10061039)
Supplement: Supplementary file 1 [file plants-10-01039-s001.zip › 20210513_rev2_Plants_AQP_supplementary_tables_FINAL.xlsx]

## Sheet: Table S1
Supplementary table 1. Genomic resources of five plant species used in this study.
Species	Download site	Transcriptome accession number
Arabidopsis	https://phytozome.jgi.doe.gov/pz/portal.html	SRR2187609, SRR1773569, SRR633727, SRR1773573, SRR1773572, SRR633726, SRR1773570
Rice	http://rice.plantbiology.msu.edu/pub/data/Eukaryotic_Projects/o_sativa/annotation_dbs/pseudomolecules/version_7.0/all.dir/	DRR013723, ERR855945, SRR1179192, ERR855947
Pepper	http://peppergenome.snu.ac.kr/	Data described in Kim, S. et al. Genome sequence of the hot pepper provides insights into the evolution of pungency in Capsicum species. Nat. Genet. 46, 270-278 (2014).
Potato	https://phytozome.jgi.doe.gov/pz/portal.html	SRR122122, SRR122124, SRR1207290, SRR122109
Tomato	ftp://ftp.solgenomics.net/genomes/Solanum_lycopersicum/	SRR3031978, SRR1514810, SRR3031982

## Sheet: Table S2
Supplementary table 2. Detailed information of individual AQP genes in four plant genomes.
No.	Gene Name	Previously known name	Locus ID	TMHa	Subfamily	Subgroup	Position				Location
							H2(37)	H5(143)	LE1(152)	LE2(158)
1	AtPIP1;1	AtPIP2;8	AT2G16850.1	6	PIP	PIP1	F	H	T	R	Chr2
2	AtPIP1;2	AtPIP2;7	AT4G35100.1	6	PIP	PIP1	F	H	T	R	Chr4
3	AtPIP1;3*	-	ATHA_MIP.Chr2.1	1	PIP	PIP1	-	-	-	T	Chr2
4	AtPIP2;1	AtPIP2;2	AT2G37170.1	6	PIP	PIP2	F	H	T	R	Chr2
5	AtPIP2;2	AtPIP2;3	AT2G37180.1	6	PIP	PIP2	F	H	T	R	Chr2
6	AtPIP2;3	AtPIP2;6	AT2G39010.1	6	PIP	PIP2	F	H	T	R	Chr2
7	AtPIP2;4	AtPIP2;1	AT3G53420.1	6	PIP	PIP2	F	H	T	R	Chr3
8	AtPIP2;5	AtPIP2;5	AT3G54820.1	6	PIP	PIP2	F	H	T	R	Chr3
9	AtPIP2;6	AtPIP2;4	AT5G60660.1	6	PIP	PIP2	F	H	T	R	Chr5
10	AtPIP3;1	AtPIP1;3	AT1G01620.1	5	PIP	PIP3	F	H	T	R	Chr1
11	AtPIP3;2	AtPIP1;2	AT2G45960.1	6	PIP	PIP3	F	H	T	R	Chr2
12	AtPIP3;3	AtPIP1;1	AT3G61430.1	6	PIP	PIP3	F	H	T	R	Chr3
13	AtPIP3;4	AtPIP1;4	AT4G00430.1	6	PIP	PIP3	F	H	T	R	Chr4
14	AtPIP3;5	AtPIP1;5	AT4G23400.1	6	PIP	PIP3	F	H	T	R	Chr4
15	AtTIP1;1	AtTIP4;1	AT2G25810.1	7	TIP	TIP1	H	I	A	R	Chr2
16	AtTIP2;1	AtTIP2;1	AT3G16240.1	6	TIP	TIP2	H	I	G	R	Chr3
17	AtTIP2;2	AtTIP2;2	AT4G17340.1	6	TIP	TIP2	H	I	G	R	Chr4
18	AtTIP2;3	AtTIP2;3	AT5G47450.1	6	TIP	TIP2	H	I	G	R	Chr5
19	AtTIP2;4	AtTIP5;1	AT3G47440.1	6	TIP	TIP2	N	V	G	C	Chr3
20	AtTIP2;5	-	AT1G52180.1	3	TIP	TIP2	-	I	G	R	Chr1
21	AtTIP3;1	AtTIP3;2	AT1G17810.1	6	TIP	TIP3	H	I	A	R	Chr1
22	AtTIP3;2	AtTIP3;1	AT1G73190.1	5	TIP	TIP3	H	I	A	R	Chr1
23	AtTIP4;1	AtTIP1;	AT2G36830.1	7	TIP	TIP4	H	I	A	V	Chr2
24	AtTIP4;2	AtTIP1;2	AT3G26520.1	7	TIP	TIP4	H	I	A	V	Chr3
25	AtTIP4;3	AtTIP1;3	AT4G01470.1	7	TIP	TIP4	H	I	A	V	Chr4
26	AtTIP4;4*	-	ATHA_MIP.Chr5.1	1	TIP	TIP4	H	-	-	-	Chr5
27	AtNIP1;1	AtNIP5;1	AT4G10380.1	5	NIP	NIP1	A	I	G	R	Chr4
28	AtNIP1;2	AtNIP6;1	AT1G80760.1	6	NIP	NIP1	A	I	A	R	Chr1
29	AtNIP1;3	AtNIP7;1	AT3G06100.1	6	NIP	NIP1	A	V	G	R	Chr3
30	AtNIP3;1	AtNIP1;1	AT4G19030.1	6	NIP	NIP3	W	V	A	R	Chr4
31	AtNIP3;2	AtNIP1;2	AT4G18910.1	6	NIP	NIP3	W	V	A	R	Chr4
32	AtNIP3;3	AtNIP4;1	AT5G37810.1	6	NIP	NIP3	W	V	A	R	Chr5
33	AtNIP3;4	AtNIP4;2	AT5G37820.1	6	NIP	NIP3	W	V	A	R	Chr5
34	AtNIP3;5	-	AT2G29870.1	3	NIP	NIP3	-	V	A	R	Chr2
35	AtNIP3;6	AtNIP2;1	AT2G34390.1	5	NIP	NIP3	W	V	A	R	Chr2
36	AtNIP3;7	AtNIP3;1	AT1G31885.1	6	NIP	NIP3	W	I	A	R	Chr1
37	AtNIP3;8*	-	ATHA_MIP.Chr2.2	2	NIP	NIP3	W	-	-	-	Chr2
38	AtSIP1;1	AtSIP1;1	AT3G04090.1	6	SIP	SIP1	L	-	P	I	Chr3
39	AtSIP1;2	AtSIP2;1	AT3G56950.1	6	SIP	SIP1	F	G	G	A	Chr3
40	AtSIP1;3	AtSIP1;2	AT5G18290.1	5	SIP	SIP1	V	-	P	I	Chr5
41	AtSIP1;4	-	AT2G16835.1	0	SIP	SIP1	-	-	-	P	Chr2
42	OsPIP1;1	OsPIP2;8	LOC_Os03g64330.1	6	PIP	PIP1	F	H	T	R	Chr3
43	OsPIP1;2	OsPIP2;6	LOC_Os04g16450.1	5	PIP	PIP1	F	H	T	R	Chr4
44	OsPIP1;3	OsPIP2;3	LOC_Os04g44060.1	6	PIP	PIP1	F	H	T	R	Chr4
45	OsPIP1;4	OsPIP2;2	LOC_Os02g41860.1	6	PIP	PIP1	F	H	T	R	Chr2
46	OsPIP1;5	-	LOC_Os07g26640.1	5	PIP	PIP1	-	H	T	R	Chr7
47	OsPIP1;6	OsPIP2;5	LOC_Os07g26660.1	6	PIP	PIP1	F	H	T	R	Chr7
48	OsPIP1;7	OsPIP2;1	LOC_Os07g26690.1	6	PIP	PIP1	F	H	T	R	Chr7
49	OsPIP1;8	OsPIP2;7	LOC_Os09g36930.1	6	PIP	PIP1	F	H	T	R	Chr9
50	OsPIP1;9	-	LOC_Os10g34000.1	4	PIP	PIP1	-	H	T	R	Chr10
51	OsPIP1;10	OsPIP2;4	LOC_Os07g26630.1	7	PIP	PIP1	F	H	T	R	Chr7
52	OsPIP3;1	OsPIP1;1	LOC_Os02g44630.1	6	PIP	PIP3	F	H	T	R	Chr2
53	OsPIP3;2	OsPIP1;3	LOC_Os02g57720.1	6	PIP	PIP3	F	H	T	R	Chr2
54	OsPIP3;3	OsPIP1;2	LOC_Os04g47220.1	6	PIP	PIP3	F	H	T	R	Chr4
55	OsTIP1;1	OsTIP4;3	LOC_Os01g13120.1	6	TIP	TIP1	H	I	A	R	Chr1
56	OsTIP1;2	OsTIP4;1	LOC_Os05g14240.1	6	TIP	TIP1	T	T	A	R	Chr5
57	OsTIP1;3	OsTIP4;2	LOC_Os01g13130.1	7	TIP	TIP1	Q	T	A	R	Chr1
58	OsTIP2;1	OsTIP5;1	LOC_Os04g46490.1	6	TIP	TIP2	Q	V	A	R	Chr4
59	OsTIP2;2	OsTIP2;1	LOC_Os02g44080.1	6	TIP	TIP2	H	I	G	R	Chr2
60	OsTIP2;3	OsTIP2;2	LOC_Os06g22960.1	6	TIP	TIP2	H	I	G	R	Chr6
61	OsTIP2;4	-	LOC_Os04g46530.1	3	TIP	TIP2	-	I	S	R	Chr4
62	OsTIP3;1	OsTIP3;2	LOC_Os04g44570.1	6	TIP	TIP3	H	I	A	R	Chr4
63	OsTIP3;2	OsTIP3;1	LOC_Os10g35050.1	6	TIP	TIP3	H	M	A	R	Chr10
64	OsTIP4;1	OsTIP1;2	LOC_Os01g74450.1	7	TIP	TIP4	H	I	A	V	Chr1
65	OsTIP4;2	OsTIP1;1	LOC_Os03g05290.1	6	TIP	TIP4	H	I	A	V	Chr3
66	OsNIP1;1	OsNIP3;3	LOC_Os08g05600.1	6	NIP	NIP1	A	I	A	R	Chr8
67	OsNIP1;2	-	LOC_Os08g05580.1	6	NIP	NIP1	A	A	P	R	Chr8
68	OsNIP1;3	OsNIP3;2	LOC_Os08g05590.1	6	NIP	NIP1	A	A	A	R	Chr8
69	OsNIP1;4	OsNIP3;1	LOC_Os10g36924.1	6	NIP	NIP1	A	I	G	R	Chr10
70	OsNIP1;5	-	LOC_Os12g10280.1	7	NIP	NIP1	I	V	A	R	Chr12
71	OsNIP2;1	OsNIP2;2	LOC_Os06g12310.1	6	NIP	NIP2	G	S	G	R	Chr6
72	OsNIP2;2	OsNIP2;1	LOC_Os02g51110.1	6	NIP	NIP2	G	S	G	R	Chr2
73	OsNIP3;1	OsNIP1;3	LOC_Os05g11560.1	5	NIP	NIP3	W	V	A	R	Chr5
74	OsNIP3;2	OsNIP1;2	LOC_Os01g10600.1	6	NIP	NIP3	W	V	A	R	Chr1
75	OsNIP3;3	OsNIP1;1	LOC_Os02g13870.1	6	NIP	NIP3	W	V	A	R	Chr2
76	OsNIP3;4	OsNIP1;4	LOC_Os06g35930.1	6	NIP	NIP3	W	V	A	R	Chr6
77	OsNIP3;5	OsNIP4;1	LOC_Os01g02190.1	6	NIP	NIP3	V	G	G	R	Chr1
78	OsNIP3;6*	-	OJAP_MIP.Chr1.1	6	NIP	NIP3	W	V	A	R	Chr1
79	OsSIP1;1	OsSIP1;1	LOC_Os01g08660.1	5	SIP	SIP1	L	-	P	N	Chr1
80	OsSIP1;2	OsSIP2;1	LOC_Os03g20410.1	6	SIP	SIP1	L	-	G	S	Chr3
81	OsXIP1;1*	-	OJAP_MIP.Chr7.1	1	XIP	XIP1	T	S	T	R	Chr7
82	OsXIP1;2*	-	OJAP_MIP.Chr1.2	1	XIP	XIP1	-	S	V	Q	Chr1
83	StPIP1;1	StPIP2;9	PGSC0003DMP400006405	6	PIP	PIP1	F	H	T	R	Chr2
84	StPIP1;2	StPIP2;8	PGSC0003DMP400046426	6	PIP	PIP1	F	H	T	R	Chr10
85	StPIP1;3*	-	STUB_MIP.ST4.03ch01.1	4	PIP	PIP1	F	V	D	G	Chr1
86	StPIP1;4	StPIP2;7	PGSC0003DMP400010967	4	PIP	PIP1	F	Q	-	-	Chr1
87	StPIP1;5	StPIP2;10	PGSC0003DMP400040604	6	PIP	PIP1	L	H	T	R	Chr5
88	StPIP2;1	StPIP2;5	PGSC0003DMP400014215	6	PIP	PIP2	F	H	T	R	Chr11
89	StPIP2;2	StPIP2;4	PGSC0003DMP400018527	6	PIP	PIP2	F	H	T	R	Chr10
90	StPIP2;3	StPIP2;1	PGSC0003DMP400036308	6	PIP	PIP2	F	H	T	R	Chr9
91	StPIP2;4	StPIP2;2	PGSC0003DMP400036311	7	PIP	PIP2	F	H	T	R	Chr9
92	StPIP2;5	StPIP2;6	PGSC0003DMP400041843	6	PIP	PIP2	F	H	T	R	Chr6
93	StPIP2;6	StPIP2;3	PGSC0003DMP400036312	5	PIP	PIP2	-	H	T	R	Chr9
94	StPIP2;7*	-	STUB_MIP.ST4.03ch00.1	2	PIP	PIP2	-	-	-	-	-
95	StPIP3;1	StPIP1;1	PGSC0003DMP400008878	6	PIP	PIP3	F	H	T	R	Chr12
96	StPIP3;2	StPIP1;5	PGSC0003DMP400000112	6	PIP	PIP3	F	H	T	R	Chr1
97	StPIP3;3	StPIP1;2	PGSC0003DMP400010252	6	PIP	PIP3	F	H	T	R	Chr8
98	StPIP3;4	StPIP1;3	PGSC0003DMP400021836	6	PIP	PIP3	F	H	T	R	Chr8
99	StPIP3;5	StPIP1;4	PGSC0003DMP400036064	6	PIP	PIP3	F	H	T	R	Chr3
100	StPIP3;6	-	PGSC0003DMP400043124	1	PIP	PIP3	-	H	T	R	Chr1
101	StPIP3;7*	-	STUB_MIP.ST4.03ch03.1	1	PIP	PIP3	F	-	-	-	Chr3
102	StTIP1;1	StTIP4;1	PGSC0003DMP400016970	7	TIP	TIP1	H	I	A	R	Chr8
103	StTIP2;1	StTIP2;4	PGSC0003DMP400021050	6	TIP	TIP2	H	I	G	R	Chr6
104	StTIP2;2	StTIP5;1	PGSC0003DMP400026077	6	TIP	TIP2	H	V	G	Y	Chr3
105	StTIP2;3	StTIP2;2	PGSC0003DMP400028906	7	TIP	TIP2	H	I	G	R	Chr6
106	StTIP2;4	StTIP2;3	PGSC0003DMP400004546	7	TIP	TIP2	H	I	G	R	Chr3
107	StTIP2;5	StTIP2;1	PGSC0003DMP400045965	7	TIP	TIP2	H	I	G	R	Chr12
108	StTIP3;1	StTIP3;2	PGSC0003DMP400026786	6	TIP	TIP3	H	T	A	R	Chr3
109	StTIP3;2	StTIP3;1	PGSC0003DMP400046813	6	TIP	TIP3	H	V	A	R	Chr6
110	StTIP4;1	StTIP1;3	PGSC0003DMP400012641	7	TIP	TIP4	H	I	A	V	Chr6
111	StTIP4;2	StTIP1;1	PGSC0003DMP400048981	6	TIP	TIP4	H	I	A	V	Chr10
112	StTIP4;3	StTIP1;2	PGSC0003DMP400052747	6	TIP	TIP4	H	I	A	V	Chr6
113	StNIP1;1	StNIP5;1	PGSC0003DMP400010282	5	NIP	NIP1	S	I	A	R	Chr8
114	StNIP1;2	StNIP6;1	PGSC0003DMP400024829	6	NIP	NIP1	T	I	A	R	Chr3
115	StNIP1;3	StNIP7;1	PGSC0003DMP400056607	6	NIP	NIP1	A	V	G	R	Chr1
116	StNIP2;1	-	PGSC0003DMP400024240	4	NIP	NIP2	-	S	G	R	-
117	StNIP2;2	-	PGSC0003DMP400024238	2	NIP	NIP2	G	-	-	-	-
118	StNIP3;1	StNIP4;1	PGSC0003DMP400010557	6	NIP	NIP3	W	I	A	R	Chr6
119	StNIP3;2	StNIP4;2	PGSC0003DMP400015026	5	NIP	NIP3	W	V	A	R	Chr12
120	StNIP3;3	StNIP1;2	PGSC0003DMP400048384	6	NIP	NIP3	W	V	A	R	Chr3
121	StNIP3;4	StNIP1;1β	PGSC0003DMP400049544	5	NIP	NIP3	W	V	A	R	Chr2
122	StNIP3;5	StNIP3;2	PGSC0003DMP400053063	6	NIP	NIP3	W	V	A	R	Chr5
123	StNIP3;6	StNIP3;1	PGSC0003DMP400053390	7	NIP	NIP3	W	V	A	R	Chr2
124	StNIP3;7	-	PGSC0003DMP400049539	0	NIP	NIP3	-	S	-	-	Chr2
125	StNIP3;8*	-	STUB_MIP.ST4.03ch02.1	9	NIP	NIP3	W	V	A	R	Chr2
126	StSIP1;1	StSIP1;2	PGSC0003DMP400032820	5	SIP	SIP1	I	-	P	N	Chr12
127	StSIP1;2	-	PGSC0003DMP400024366	1	SIP	SIP1	L	-	A	L	Chr6
128	StSIP1;3	StSIP1;1α	PGSC0003DMP400014669	5	SIP	SIP1	I	-	P	N	Chr10
129	StXIP1;1	StXIP2;1α	PGSC0003DMP400046409	6	XIP	XIP1	I	T	A	R	Chr10
130	StXIP1;2	StXIP3;1	PGSC0003DMP400046411	7	XIP	XIP1	A	T	A	R	Chr10
131	StXIP1;3	StXIP4;1	PGSC0003DMP400002967	5	XIP	XIP1	I	T	A	R	Chr1
132	StXIP1;4	StXIP1;1α	PGSC0003DMP400007883	6	XIP	XIP1	I	T	A	R	Chr10
133	StXIP1;5*	-	STUB_MIP.ST4.03ch10.1	2	XIP	XIP1	-	T	A	R	Chr10
134	StXIP1;6	-	PGSC0003DMP400056713	3	XIP	XIP1	-	T	V	R	Chr10
135	StXIP1;7*	-	STUB_MIP.ST4.03ch10.3	5	XIP	XIP1	L	T	V	R	Chr10
136	StXIP1;8*	-	STUB_MIP.ST4.03ch07.1	3	XIP	XIP1	I	-	-	-	Chr7
137	StXIP1;9*	-	STUB_MIP.ST4.03ch08.1	0	XIP	XIP1	-	F	A	R	Chr8
138	StXIP1;10*	-	STUB_MIP.ST4.03ch10.2	2	XIP	XIP1	-	T	A	R	Chr10
139	SlPIP1;1	SlPIP2;11	Solyc02g083510.3.1	6	PIP	PIP1	F	H	T	R	Chr2
140	SlPIP1;2	SlPIP2;12	Solyc05g055990.3.1	5	PIP	PIP1	F	H	T	R	Chr5
141	SlPIP1;3	SlPIP2;9	Solyc10g055630.2.1	6	PIP	PIP1	F	H	T	R	Chr10
142	SlPIP1;4*	-	SLYC_MIP.SL3.0ch01.3	6	PIP	PIP1	F	H	T	R	Chr1
143	SlPIP2;1	SlPIP2;4	Solyc06g011350.3.1	6	PIP	PIP2	F	H	T	R	Chr6
144	SlPIP2;2	SlPIP2;10	Solyc09g007760.3.1	6	PIP	PIP2	F	H	T	R	Chr9
145	SlPIP2;3	SlPIP2;1	Solyc09g007770.2.1	6	PIP	PIP2	F	H	T	R	Chr9
146	SlPIP2;4	SlPIP2;5	Solyc10g084120.2.1	6	PIP	PIP2	F	H	T	R	Chr10
147	SlPIP2;5	SlPIP2;6	Solyc11g069430.2.1	6	PIP	PIP2	F	H	T	R	Chr11
148	StPIP3;1	SlPIP1;7	Solyc03g096290.3.1	6	PIP	PIP3	F	H	T	R	Chr3
149	StPIP3;2	SlPIP1;2	Solyc01g094690.3.1	6	PIP	PIP3	F	H	T	R	Chr1
150	StPIP3;3	SlPIP1;1	Solyc08g008050.3.1	6	PIP	PIP3	F	H	T	R	Chr8
151	StPIP3;4	SlPIP1;5	Solyc08g081190.3.1	6	PIP	PIP3	F	H	T	R	Chr8
152	StPIP3;5	SlPIP1;3	Solyc12g056220.2.1	6	PIP	PIP3	F	H	T	R	Chr12
153	StPIP3;6*	-	SLYC_MIP.SL3.0ch01.1	2	PIP	PIP3	-	H	T	R	Chr1
154	SlTIP1;1	SlTIP4;1	Solyc08g066840.3.1	6	TIP	TIP1	H	I	A	R	Chr8
155	SlTIP2;1	SlTIP5;1	Solyc03g093230.3.1	6	TIP	TIP2	N	V	G	Y	Chr3
156	SlTIP2;2	SlTIP2;2	Solyc03g120475.1.1	7	TIP	TIP2	H	I	G	R	Chr3
157	SlTIP2;3	SlTIP2;3	Solyc06g060760.3.1	6	TIP	TIP2	H	I	G	R	Chr6
158	SlTIP2;4	SlTIP2;1	Solyc12g044330.2.1	7	TIP	TIP2	H	I	G	R	Chr12
159	SlTIP2;5	SlTIP2;5	Solyc06g066560.2.1	2	TIP	TIP2	-	I	G	R	Chr6
160	SlTIP3;1	SlTIP3;2	Solyc03g019820.3.1	6	TIP	TIP3	H	T	A	R	Chr3
161	SlTIP3;2	SlTIP3;1	Solyc06g072130.3.1	6	TIP	TIP3	H	V	A	R	Chr6
162	SlTIP4;1	SlTIP1;1	Solyc06g074820.3.1	7	TIP	TIP4	H	I	A	V	Chr6
163	SlTIP4;2	SlTIP1;2	Solyc06g075650.3.1	6	TIP	TIP4	H	I	A	V	Chr6
164	SlTIP4;3	SlTIP1;3	Solyc10g083880.2.1	6	TIP	TIP4	H	I	A	V	Chr10
165	SlNIP1;1	SlNIP7;1	Solyc01g079890.3.1	6	NIP	NIP1	A	V	G	R	Chr1
166	SlNIP1;2	SlNIP6;1	Solyc03g117050.3.1	7	NIP	NIP1	T	I	A	R	Chr3
167	SlNIP1;3	SlNIP5;1	Solyc08g013730.3.1	5	NIP	NIP1	S	I	A	R	Chr8
168	SlNIP2;1	SlNIP2;1	Solyc03g013340.3.1	6	NIP	NIP2	G	S	G	R	Chr3
169	SlNIP3;1	SlNIP2;2	Solyc02g071910.1.1	4	NIP	NIP3	-	S	G	R	Chr2
170	SlNIP3;2	SlNIP1;2	Solyc02g071920.3.1	6	NIP	NIP3	W	V	A	R	Chr2
171	SlNIP3;3	SlNIP4;1	Solyc02g091420.3.1	6	NIP	NIP3	W	V	A	R	Chr2
172	SlNIP3;4	SlNIP1;1	Solyc03g005980.3.1	6	NIP	NIP3	W	V	A	R	Chr3
173	SlNIP3;5	SlNIP4;2	Solyc05g008080.2.1	5	NIP	NIP3	-	V	A	R	Chr5
174	SlNIP3;6	SlNIP3;1	Solyc06g073590.3.1	6	NIP	NIP3	W	I	A	R	Chr6
175	SlNIP3;7	SlNIP4;3	Solyc02g063310.2.1	3	NIP	NIP3	W	-	-	-	Chr2
176	SlNIP3;8	SlNIP3;2	Solyc12g057050.2.1	5	NIP	NIP3	W	V	A	R	Chr12
177	SlSIP1;1	SlSIP2;1	Solyc01g056720.3.1	6	SIP	SIP1	I	-	G	S	Chr1
178	SlSIP1;2	SlSIP1;1	Solyc12g019690.2.1	5	SIP	SIP1	I	-	P	N	Chr12
179	SlSIP1;3	SlSIP1;2	Solyc10g078490.2.1	5	SIP	SIP1	L	-	P	N	Chr10
180	SlXIP1;1	-	Solyc10g054790.2.1	7	XIP	XIP1	l	T	V	R	Chr10
181	SlXIP1;2	SlXIP1;4	Solyc10g054800.2.1	7	XIP	XIP1	A	T	A	R	Chr10
182	SlXIP1;3	SlXIP1;3	Solyc10g054810.2.1	6	XIP	XIP1	I	T	A	R	Chr10
183	SlXIP1;4	SlXIP1;2	Solyc10g054820.2.1	7	XIP	XIP1	I	T	A	R	Chr10
184	SlXIP1;5	SlXIP1;1	Solyc10g054840.2.1	6	XIP	XIP1	I	T	A	R	Chr10
185	SlXIP1;6*	-	SLYC_MIP.SL3.0ch08.1	0	XIP	XIP1	-	F	-	R	Chr8
186	SlXIP1;7*	-	SLYC_MIP.SL3.0ch01.2	7	XIP	XIP1	I	T	A	R	Chr1
* Newly annotated genes omitted in previous annotations
a Number of transmembrane helices contained in each AQP domain

## Sheet: Table S3
Supplementary table 3. Statistics of motifs identified from five plant AQP genes by MEME.
Motif	Motif length	Motif logo	Positiona	Number of genes containing target motif
[1]	14		4	69
[2]	25		9	205
[3]	21		6	183
[4]	21		14	202
[5]	10		4	141
[6]	26		1	182
[7]	14		11	86
[8]	24		3	64
[9]	10		8	71
[10]	10		5	48
[11]	20		3	64
[12]	14		11	53
[13]	19		3	55
[14]	15		7	54
[15]	13		7	33
[16]	10		7	56
[17]	10		5	51
[18]	10		5	67
[19]	10		4	1
[20]	22		7	17
[21]	19		11	18
[22]	16		11	50
[23]	20		3	15
[24]	10		10	17
[25]	10		2	16
[26]	23		7	10
[27]	13		7	13
[28]	14		6	8
[29]	17		11	10
[30]	10		5	15
[31]	25		5	5
[32]	36		1	7
[33]	24		3	4
[34]	26		6	26
[35]	25		3	5
[36]	25		3	3
[37]	10		14	7
[38]	10		7	11
[39]	10		1	5
[40]	10		7	6
[41]	11		9	7
[42]	13		9	4
[44]	10		3	5
[45]	13		3	1
[46]	10		7	2
[47]	10		5	19
[49]	14		6	1
[50]	14		12	18
a Motif position in AQP domain. See Figure 1 and Supplementary fugure 1.
